# Supplementary material for: Co6(μ3-OH)6cluster based coordination polymer as an effective heterogeneous catalyst for aerobic epoxidation of alkenes
Source: Royal Society of Chemistry journal article supplement (doi:10.1039/c3dt52562g), 2013-10-31
Supplement: c3dt52562g.pdf [file c3dt52562g.pdf]

## Co<sub>6</sub>(μ<sub>3</sub>-OH)<sub>6</sub> cluster based coordination polymer as an effective heterogeneous catalyst for aerobic epoxidation of alkenes

Junkuo Gao,<sup>†</sup> Linlu Bai,<sup>†</sup> Qian Zhang, Yongxin Li, Ganguly Rakesh, Jong-Min Lee, Yanhui Yang\* and Qichun Zhang\*

### Supporting Information:

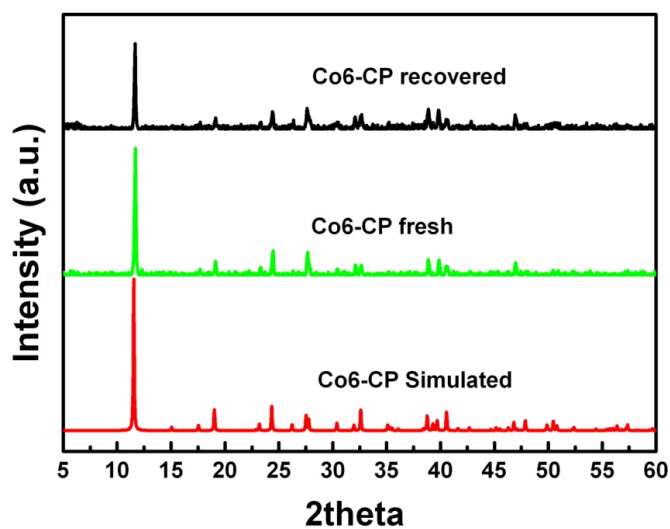

Figure S1. The simulated and experimental powder XRD patterns of Co6-CP.

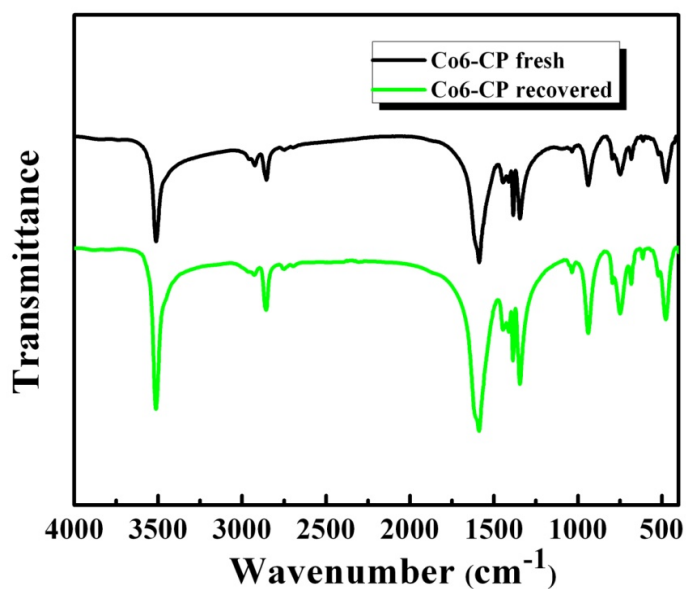

**Figure S2.** The IR spectra of pristine and recovered Co6-CP.

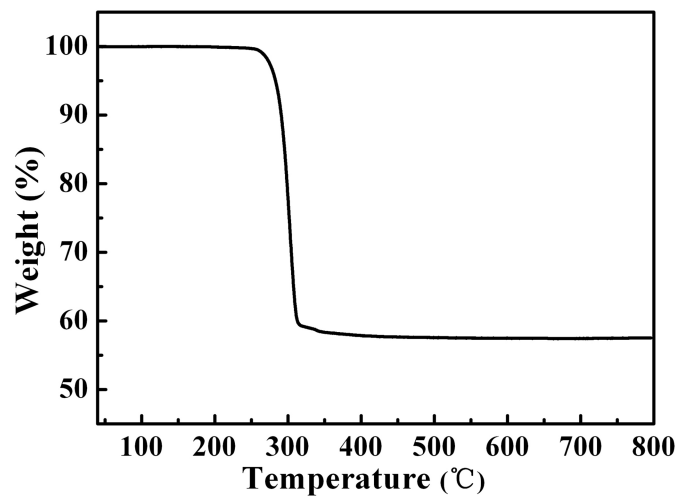

**Figure S3.** The TGA spectra of fresh Co6-CP.

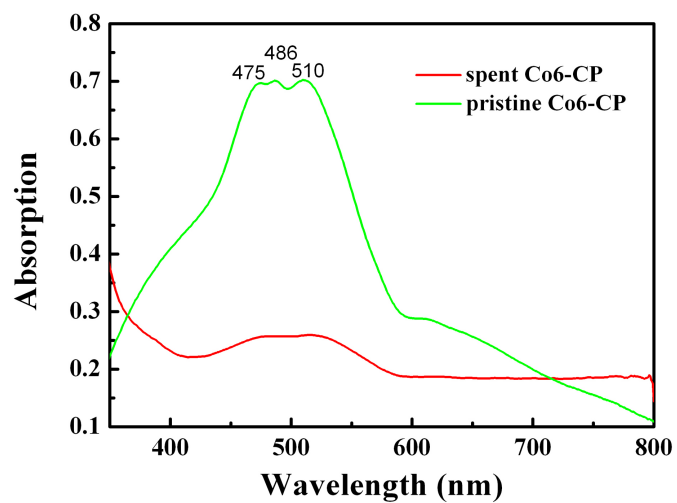

**Figure S4.** The UV-vis spectra of the Co6-CP: the pristine one (green),the spent one (red).

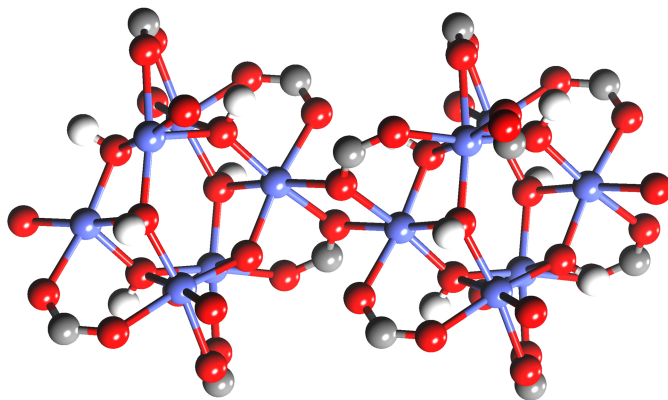

**Figure S5.** The coordination mode of ligands in Co6-CP. Color code: red ball, Oxygen; gray ball, Carbon; blue ball, Cobalt; white ball, hydrogen.
